# Supplementary material for: Global Analysis of Expression, Maturation and Subcellular Localization of Mouse Liver Transcriptome Identifies Novel Sex-biased and TCPOBOP-responsive Long Non-coding RNAs
Source: Research Square preprint supplement (doi:10.21203/rs.3.rs-147996/v1), 2021-01-25
Supplement: Supplementary file 1 [file 41af1994c5e40851ab9e09ef.xlsx]

## Sheet: S7_Bias of RNAscope Genes
Table S7 – Subcellular fraction bias of genes assayed with RNAScope. The expression of two sex-biased lncRNAs (top) and one TCPOBOP-responsive lncRNA and one TCPOBOP-responsive PCG (bottom) were visualized via RNAScope across multiple compartments, or subcellular fractions. Columns B & C indicate the subcellular fraction (compartment) biases of the sex-biased genes in untreated male and female li…
	Significant Compartment Bias (p<0.001)		FPKM
Gene	Male Untreated Liver	Female Untreated Liver	Cyto M	Cyto F	Nuc M	Nuc F	NP M	NP F	CB M	CB F
ncRNA_inter_Chr8_7423	4-fold CB	6-fold CB	2.62	0.43	6.9	1.1	13.3341	2.24	62.2465	23.49
ncRNA_inter_Chr19_14770		22-fold Nuc	0	0.04	0	2.32	0.26	4.43	0.18	8.35
ncRNA_inter_Chr7_5998			0.01	0.03	0.02	0.02	0.02	0.04	0.03	0.06
Cyp2b10		3-fold NP	85.89	169.66	105.84	221.77	128.63	242.13	59.51	156.89
Gene	Male TCPO Liver	Female TCPO Liver	Cyto M	Cyto F	Nuc M	Nuc F	NP M	NP F	CB M	CB F
ncRNA_inter_Chr7_5998			1.23	1.44	2.71	3.95	2.86	5.29	5.18	10.09
Cyp2b10	2-fold NP	3-fold NP	7217.46	7469.82	7833.4	11951.1	7769.69	9637.14	4429.42	5127.49
